# Supplementary material for: One step fabrication of polymeric ratchet structures of diverse tilting angles
Source: Royal Society of Chemistry journal article supplement (doi:10.1039/c6ra06099d), 2016-01-01
Supplement: c6ra06099d1.pdf [file c6ra06099d1.pdf]

## Supplementary Information

### **One Step Fabrication of Polymeric Ratchet Structures of Diverse Tilting Angles**

Seong Min Kang<sup>a,b</sup> and Hyunsik Yoon<sup>c\*</sup>

*<sup>a</sup>Global Frontier Center for Multiscale Energy System, Seoul National University, Seoul 151-744, Korea.*

*<sup>b</sup>Department of Mechanical and Aerospace Engineering, Seoul National University, Seoul, 151-742, Korea*

*<sup>c</sup>Department of Chemical and Biomolecular Engineering, Seoul National University of Science & Technology, Seoul, 139-743, Korea, Tel: +82 (2) 970-6670, Fax: +82 (2) 977-8317, E-mail: hsyoon@seoultech.ac.kr*

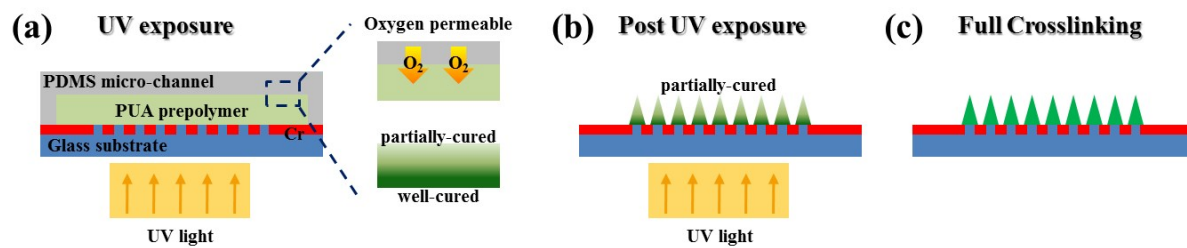

**Fig. S1** Schematic illustration of post UV exposure process for full crosslinking of PUA ratchet structures. (a) Oxygen in PDMS micro-channel inhibits the full curing of PUA prepolymer. (b) Post UV exposure process of partially-cured ratchet structures after rinsing uncured prepolymers. (c) Full crosslinking of PUA ratchet structures after UV exposure for 10 hours.
